# Supplementary material for: Preparation of Monoclonal Antibodies against the Capsid Protein and Development of an Epitope-Blocking Enzyme-Linked Immunosorbent Assay for Detection of the Antibody against Porcine Circovirus 3
Source: MDPI journal article supplement (doi:10.3390/ani14020235), 2024-01-11
Supplement: s1 [file s1]

Table S1. Primers used for identification of the B cell epitope in PCV3 Cap protein.

| Primers | Sequences (5'-3')                                                                 | Location(aa) |
|---------|-----------------------------------------------------------------------------------|--------------|
| N1      | F: CGCGGATCCGCGATGAGACACAGAGCTATATT<br>R: CCGCTCGAGCGGTTACCAGGGCTTGTTATTCT        | 1-60         |
| N2      | F: CGCGGATCCGCGATGCACGCCAACCCTTCAT<br>R: CCGCTCGAGCGGTTAGTCGTCTTGGAGCCAAG         | 61-124       |
| N3      | F: CGCGGATCCGCGATGCCTTATGCGGAAAGTTC<br>R: CCGCTCGAGCGGTTAGGGGTCATATGTGTTGA        | 125-178      |
| N4      | F: CGCGGATCCGCGATGACCGTTCAATGGGGAGC<br>R: CCGCTCGAGCGGTTAGAGAACGGACTTGTAAC        | 179-214      |
| N2-1    | F: CGCGGATCCGCGATGCACGCCAACCCTTCAT<br>R: CCGCTCGAGCGGTTAAGAAATTACAGGGCTGA         | 61-95        |
| N2-2    | F: CGCGGATCCGCGATGTATAAGATACTAAAGAT<br>R: CCGCTCGAGCGGTTAATCTATGGCTGTGTGCC        | 80-110       |
| N2-3    | F: CGCGGATCCGCGATGAGCCCTGTAATTTCTCCAG<br>R: CCGCTCGAGCGGTTAGTCGTCTTGGAGCCAAGT     | 90-124       |
| N5      | F: CGCGGATCCGCGATGCACGCCAACCCTTCAT<br>R: CCGCTCGAGCGGTTATTGGAGCCAAGTGTTT          | 61-122       |
| N6      | F: CGCGGATCCGCGATGCACGCCAACCCTTCAT<br>R: CCGCTCGAGCGGTTACCAAGTGTTTGTGGTCC         | 61-120       |
| N7      | F: CGCGGATCCGCGATGCACGCCAACCCTTCAT<br>R: CCGCTCGAGCGGTTAGTTTGTGGTCCAGGCGC         | 61-118       |
| N8      | F: CGCGGATCCGCGATGCACGCCAACCCTTCAT<br>R: CCGCTCGAGCGGTTAGGTCCAGGCGCCGTCTAG        | 61-116       |
| N9      | F: CGCGGATCCGCGATGGATCTAGACGGCGCCTGGA<br>R: CCGCTCGAGCGGTTATTAGAGAACGGACTTGTAAC   | 110-214      |
| N10     | F: CGCGGATCCGCGATGGACGGCGCCTGGACCACAA<br>R: CCGCTCGAGCGGTTATTAGAGAACGGACTTGTAAC   | 112-214      |
| N11     | F: CGCGGATCCGCGATGGCCTGGACCACAAACACT<br>R: CCGCTCGAGCGGTTATTAGAGAACGGACTTGTAAC    | 114-214      |
| N12     | F: CGCGGATCCGCGATGACCACAAACACTTGGCTC<br>R: CCGCTCGAGCGGTTATTAGAGAACGGACTTGTAAC    | 116-214      |
| N13     | F: CGCGGATCCGCGATGAACACTTGGCTCCAAGACGAC<br>R: CCGCTCGAGCGGTTATTAGAGAACGGACTTGTAAC | 118-214      |
